# Supplementary material for: A dihydrochalcone derivative and further steroidal saponins from Sansevieria trifasciata Prain
Source: publisher site journal article supplement (doi:10.1515/znc-2017-0027), 2017-05-18
Supplement: Supplementary file 1 [file Cover Letter Naturforch.doc]

February 16th, 2017

**To the Editor-in-Chief of**

**Zeitschrift für Naturforschung C**

Dear Editor,

Here enclosed is our manuscript entitled "**A dihydrochalcone derivative and further steroidal saponins from *Sansevieria trifasciata* Prain**"submitted for possible publication in Zeitschrift für Naturforschung C. In this contribution, phytochemical investigation of the ethylacetate soluble fraction from the methanol extract of the medicinal plant *Sansevieria trifasciata*led to the isolation and structure elucidation of eight secondary metabolites including five previously unreported ones. The new metabolites include a dihydrochalcone derivative named trifasciatine C and four monoacetylated steroidal saponins obtained as two pairs of inseparable regioisomers.

Their structures were elucidated mainly by extensive spectroscopic analysis (1D and 2D NMR) and HR-ESI-MS, as well as chemical methods (GC analysis of the corresponding trimethylsilated L-cysteine adducts from acid hydrolysis) and comparison of their spectral data with those of related compounds. Some of the isolated compounds were evaluated for their antiproliferative activity on Hela cells and no considerable effect was observed.

Please let me know of your decision at your earliest convenience.

Sincerely yours,

Prof. Léon Azefack Tapondjou

Department of Chemistry,

Faculty of Science,

University of Dschang,

P.O.Box 183, Dschang,

Cameroon
