# Supplementary material for: A dihydrochalcone derivative and further steroidal saponins from Sansevieria trifasciata Prain
Source: publisher site journal article supplement (doi:10.1515/znc-2017-0027), 2017-05-18
Supplement: Supplementary file 2 [file Naturforch Referees.doc]

Prof. Dr. Guan-Hua Du, Institute of Materia Medica, Chinese Academy of Medical Sciences and Peking Union Medical College, Beijing 100050, People′s Republic of China, E-mail: dugh@imm.ac.cn , Tel: +86-10-6316-5184, Fax: +86-10-6301-7757

Prof. Hideaki Otsuka, Department of Pharmacognosy, Graduate School of Biomedical and Health Sciences, Hiroshima University, 1-2-3 Kasumi, Minami-ku, Hiroshima 734-8553, Japan, E-mail: addresses: hotsuka@hiroshima-u.ac.jp, Tel.: +81 822575286.
