# Supplementary material for: A dihydrochalcone derivative and further steroidal saponins from Sansevieria trifasciata Prain
Source: publisher site journal article supplement (doi:10.1515/znc-2017-0027), 2017-05-18
Supplement: Supplementary file 3 [file Supporting information Naturforch.doc]

**A dihydrochalcone derivative and further steroidal saponins from *Sansevieria trifasciata* Prain**

Billy T. Tchegnitegni1, Rémy B. Teponno1, Kristina Jenett-Siems2, Matthias F. Melzig2, Tomofumi Miyamoto3, Léon A. Tapondjou1,*

1 Department of Chemistry, Faculty of Science, University of Dschang, P.O. Box 67, Dschang, Cameroon

2 Institut für Pharmazie (Pharmazeutische Biologie), Freie Universität Berlin, Königin-Luise-Str. 2-4, D-14195 Berlin, Germany

3 Department of Natural Products Chemistry, Graduate School of Pharmaceutical Sciences, Kyushu University, Fukuoka 812-8582, Japan

Reprint requests to Prof. Léon A. Tapondjou. Tel.: +237 675004826. E-mail: [tapondjou2001@yahoo.fr](mailto:tapondjou2001@yahoo.fr)

**S1** : Mass spectrum of compound **1**

**S2** : 1H NMR spectrum of compound **1**

**S3**: 13C NMR spectrum of compound **1**

**S4** : HMQC spectrum of compound **1**

**S5**: HMBC spectrum of compound **1**

**S6** : Mass spectrum of compounds **2/3**

**S7** : 1H NMR spectrum of compounds **2/3**

**S8** : 13C NMR spectrum of compounds **2/3**

**S9** : 1H-1H COSY spectrum of compounds **2/3**

**S10** : HMQC spectrum of compounds **2/3**

**S11** : Mass spectrum of compounds **4/5**

**S12** : 1H NMR spectrum of compounds **4/5**

**S13** : 13C NMR spectrum of compounds **4/5**

**S14** : 1H-1H COSY spectrum of compounds **4/5**

**S15** : HMQC spectrum of compounds **4/5**

**S16** : HMBC spectrum of compounds **4/5**

**S1** : Mass spectrum of compound **1**

**S2** : 1H NMR spectrum of compound **1**


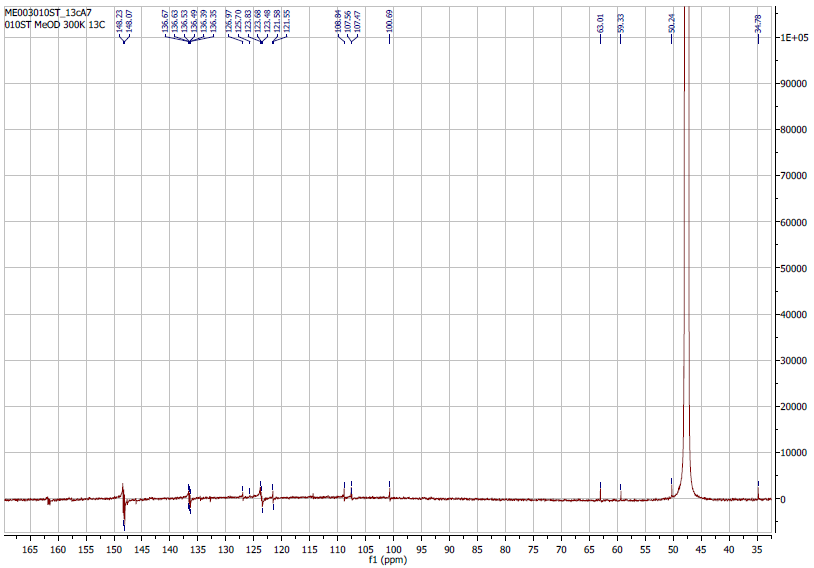


**S3**: 13C NMR spectrum of compound **1**


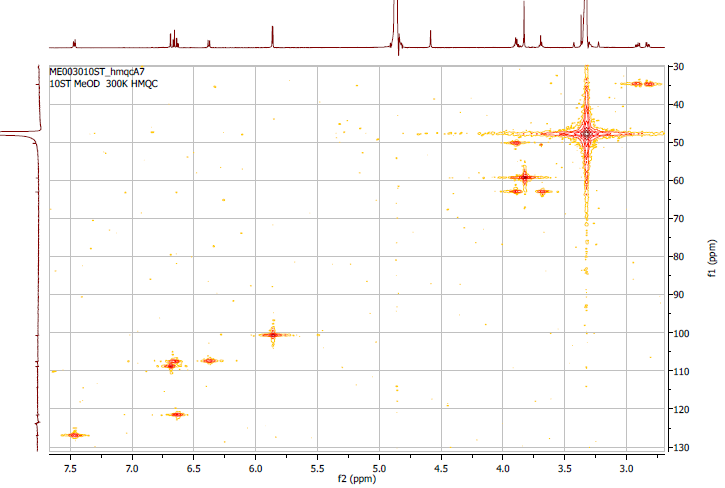


**S4** : HMQC spectrum of compound **1**


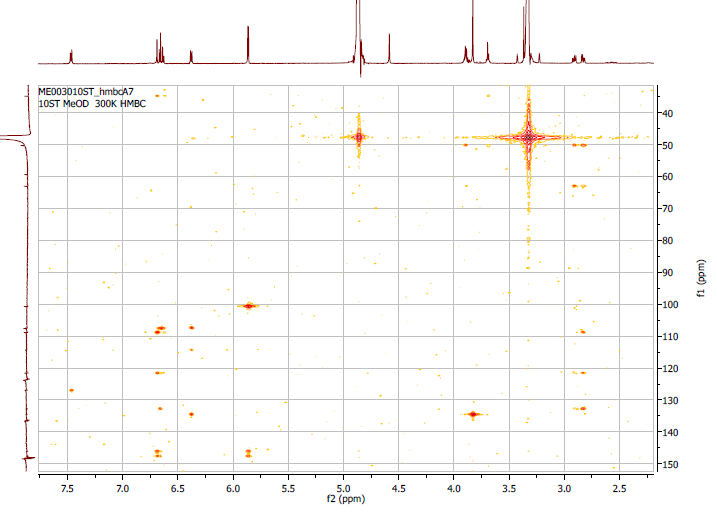


**S5**: HMBC spectrum of compound **1**

**S6** : Mass spectrum of compounds **2/3**

**S7** : 1H NMR spectrum of compounds **2/3**


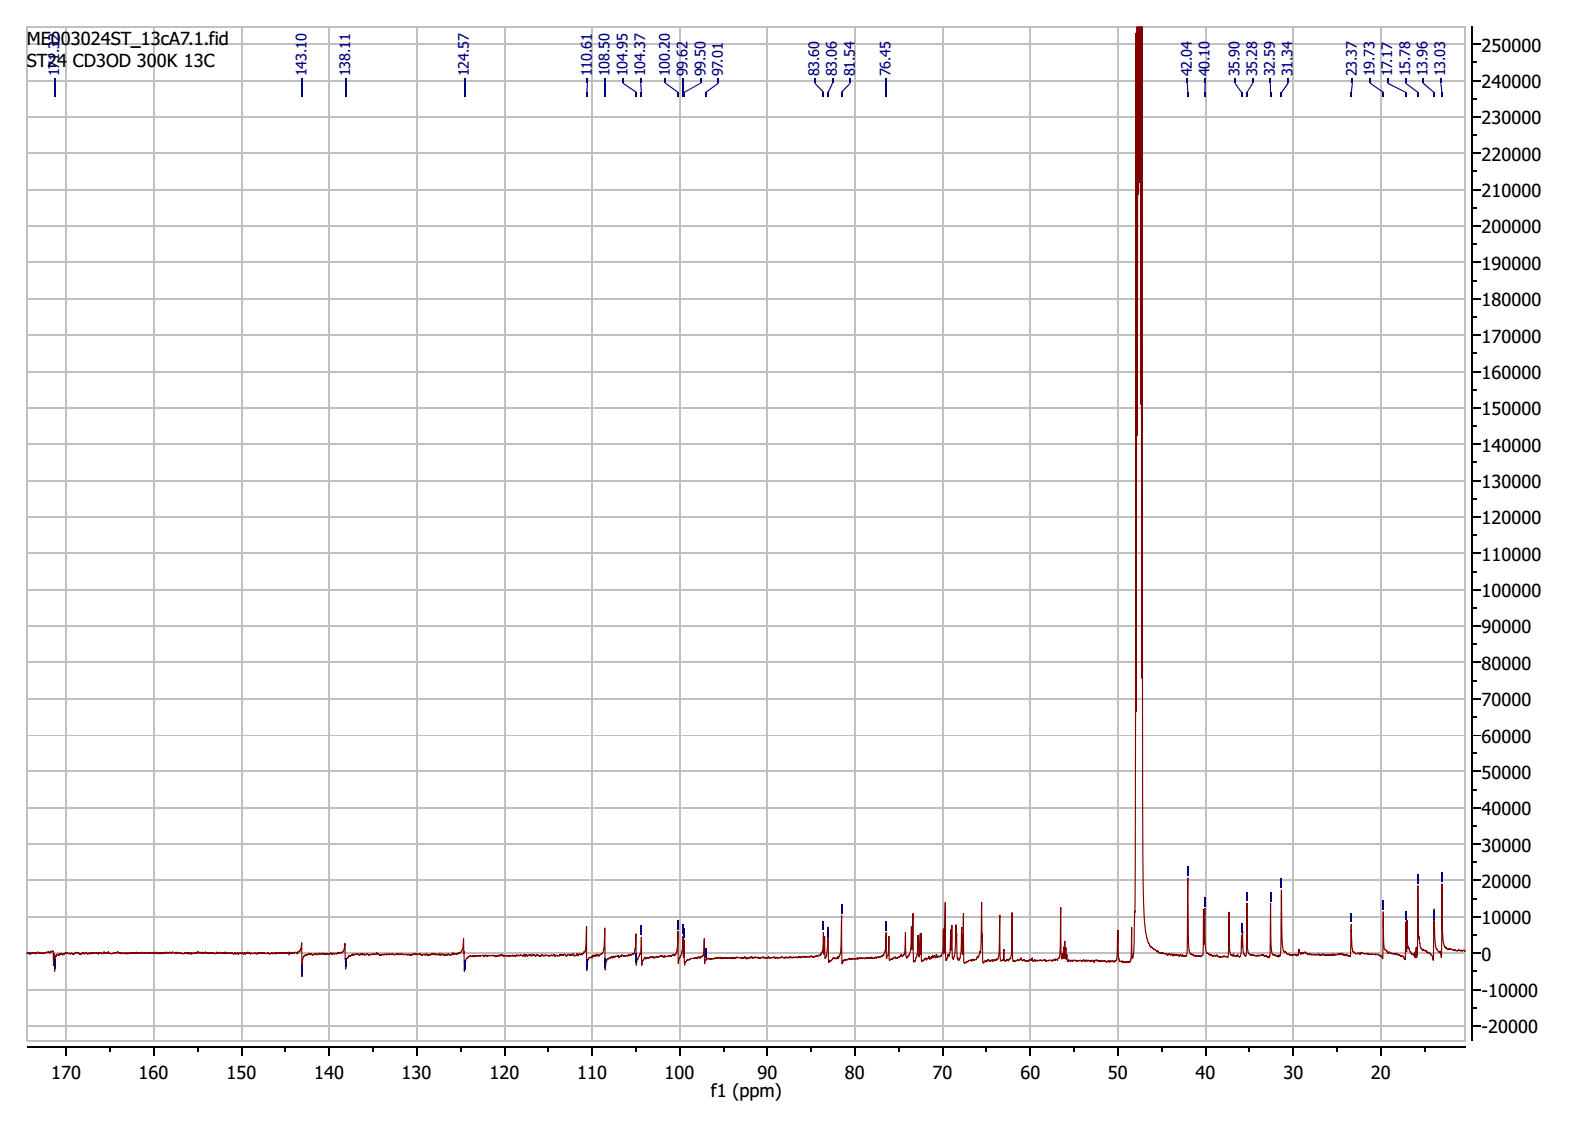


**S8** : 13C NMR spectrum of compounds **2/3**

**S9** : 1H-1H COSY spectrum of compounds **2/3**

**S10**: HMQC spectrum of compounds **2/3**

**S11**: Mass spectrum of compounds **4/5**

**S12** : 1H NMR spectrum of compounds **4/5**

**S13** : 13C NMR spectrum of compounds **4/5**

**S14** : 1H-1H COSY spectrum of compounds **4/5**

**S15** : HMQC spectrum of compounds **4/5**

**S16** : HMBC spectrum of compounds **4/5**
