# Supplementary material for: A dihydrochalcone derivative and further steroidal saponins from Sansevieria trifasciata Prain
Source: publisher site journal article supplement (doi:10.1515/znc-2017-0027), 2017-05-18
Supplement: Supplementary file 6 [file ccm.docx]

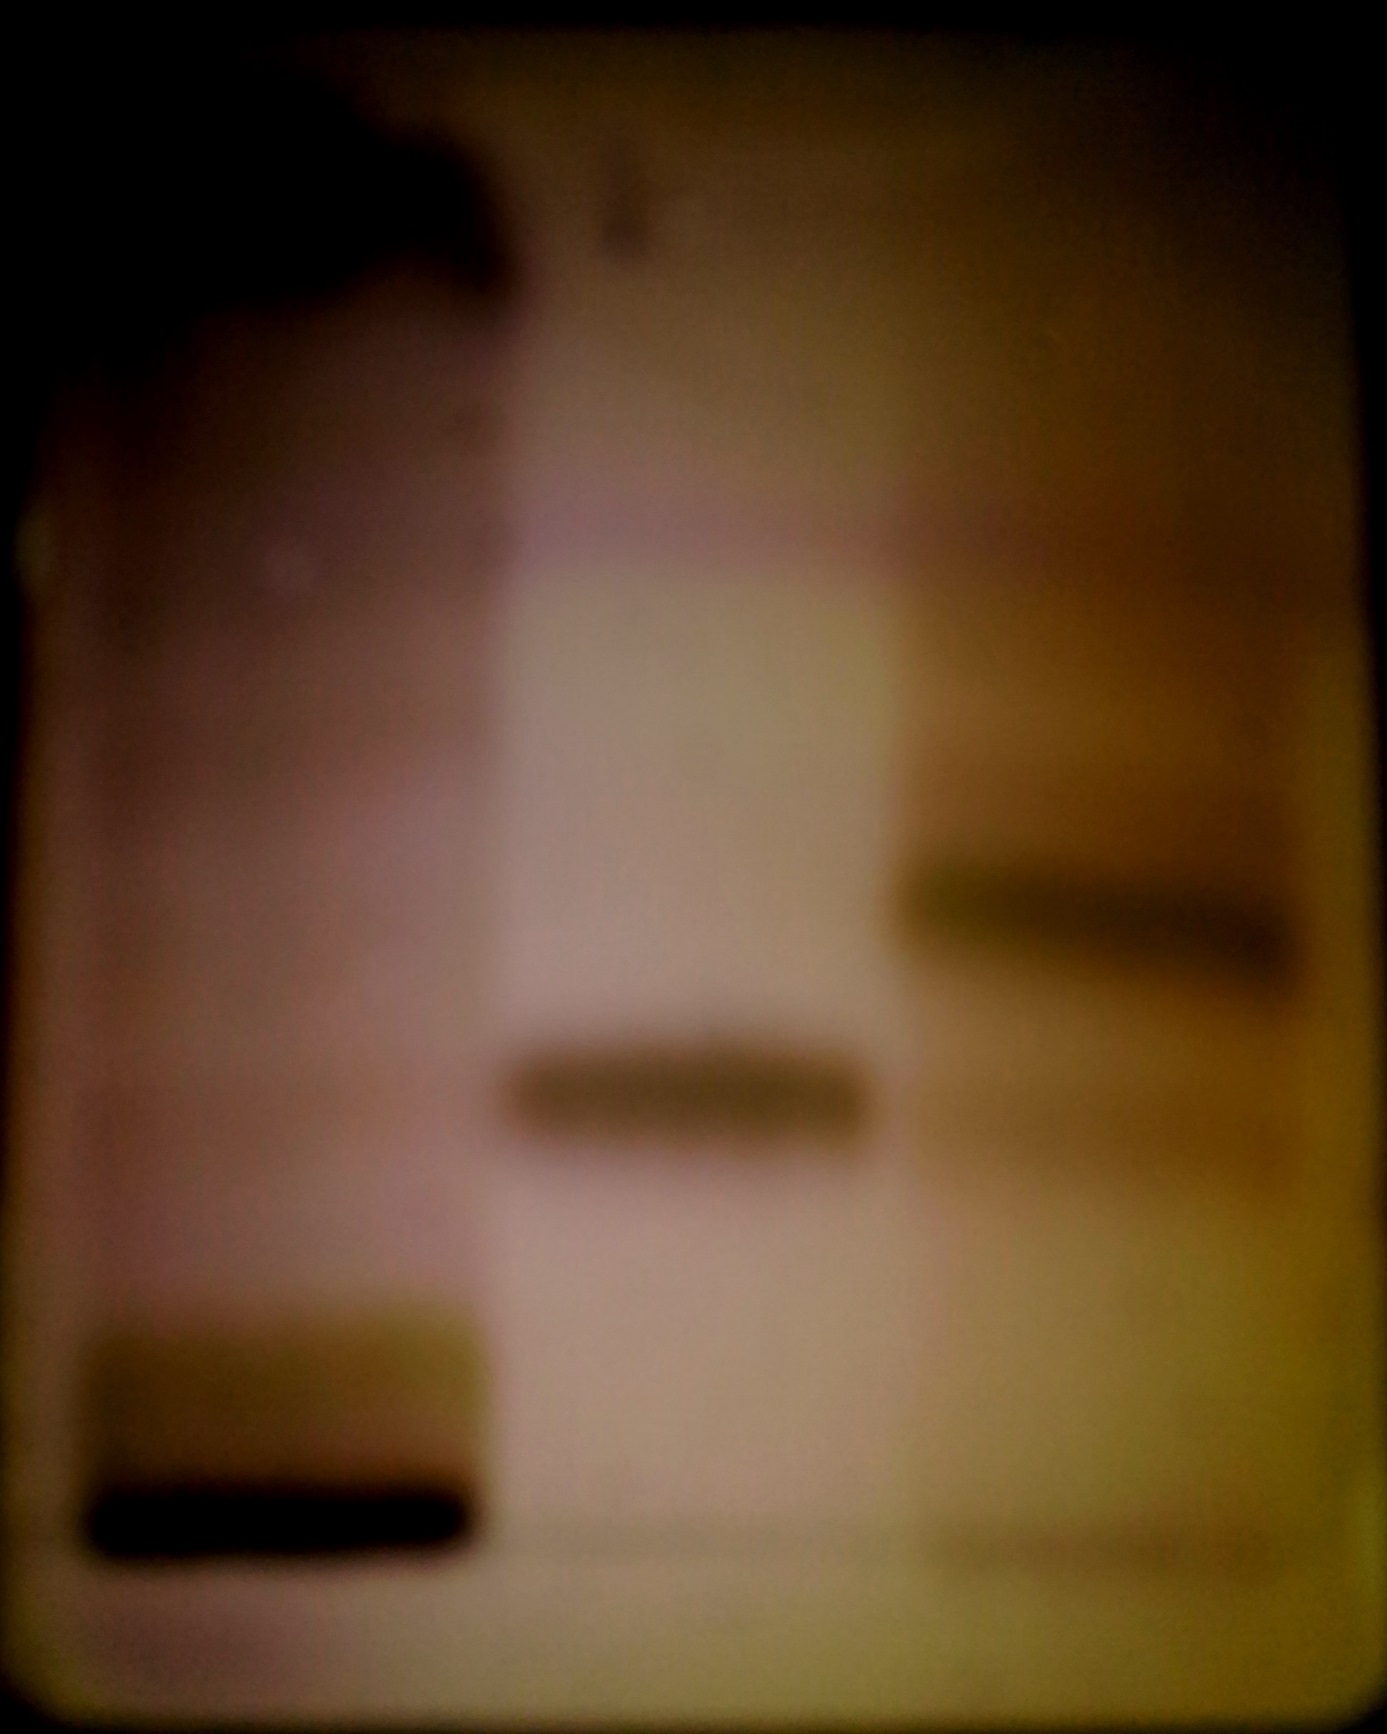


MeOH - H2O 25%

C

B

A

A = Original methanol extract

B = Trifasciatoside K/L

C = Trifasciatoside M/N

Elution solvent system of TLC plate:MeOH – H2O (75 - 25) and double set migration

Stationnary phase for the TLC plate: Reverse phase silica (RP - 18)
